# Supplementary material for: Wenn Gottes Volk sich versammelt ... Ein Streifzug durch die Geschichte des Pfarrgottesdienstes in St. Michael, Buxheim
Source: Springer Nature journal article supplement (doi:10.1038/s41541-023-00665-3), 2012-01-01
Supplement: MOESM1 [file 41541_2023_665_MOESM1_ESM.pdf]

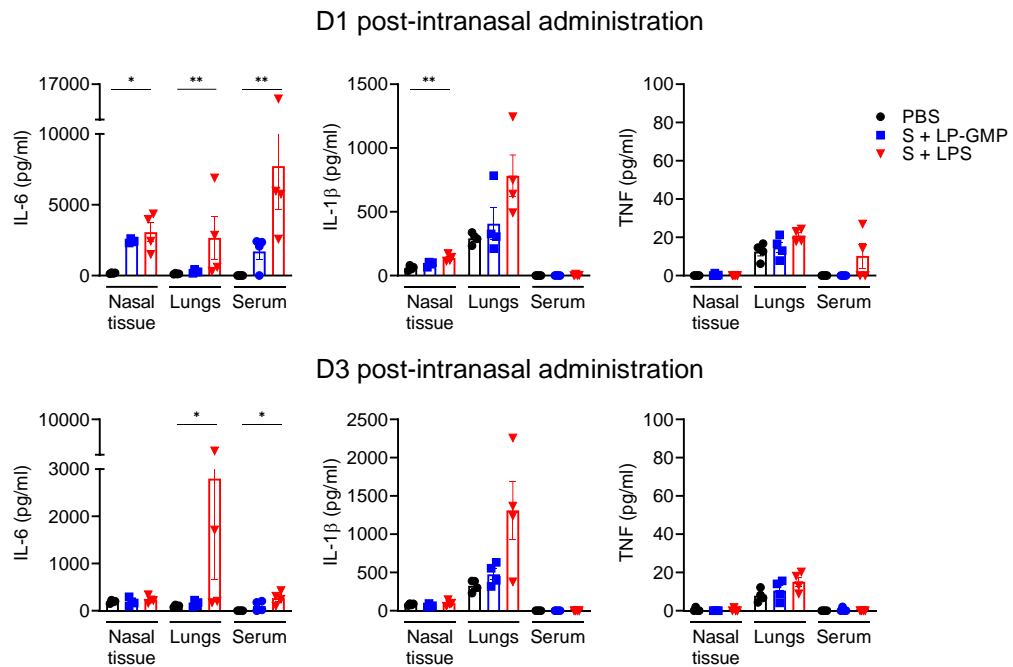

**Supplementary Figure 1. Inflammatory responses induced with Spike-LP-GMP vaccine.**

Mice were anesthetized with ketamine and xylazine and PBS, Spike-LP-GMP (3  $\mu$ g of Spike trimer, 10  $\mu$ g of C-di-GMP, 50  $\mu$ g of LP1569), or Spike-LPS (3  $\mu$ g of Spike trimer, 50  $\mu$ g of LPS) was administered via intranasal route (n=4/group). Mice were euthanized 24 h or 72 h after administration. Serum, left lobe lung homogenate and nasal tissue homogenate were collected for analysis of inflammatory cytokines (IL-6, IL-1 $\beta$ , TNF) by ELISA. Data were analyzed by one-way ANOVAs followed by post hoc Tukey's test for multiple comparisons (\*P < 0.05, \*\*P < 0.01, \*\*\*P < 0.001, and \*\*\*\*P < 0.0001), error bars, SEM. Results are representative of two independent experiments.

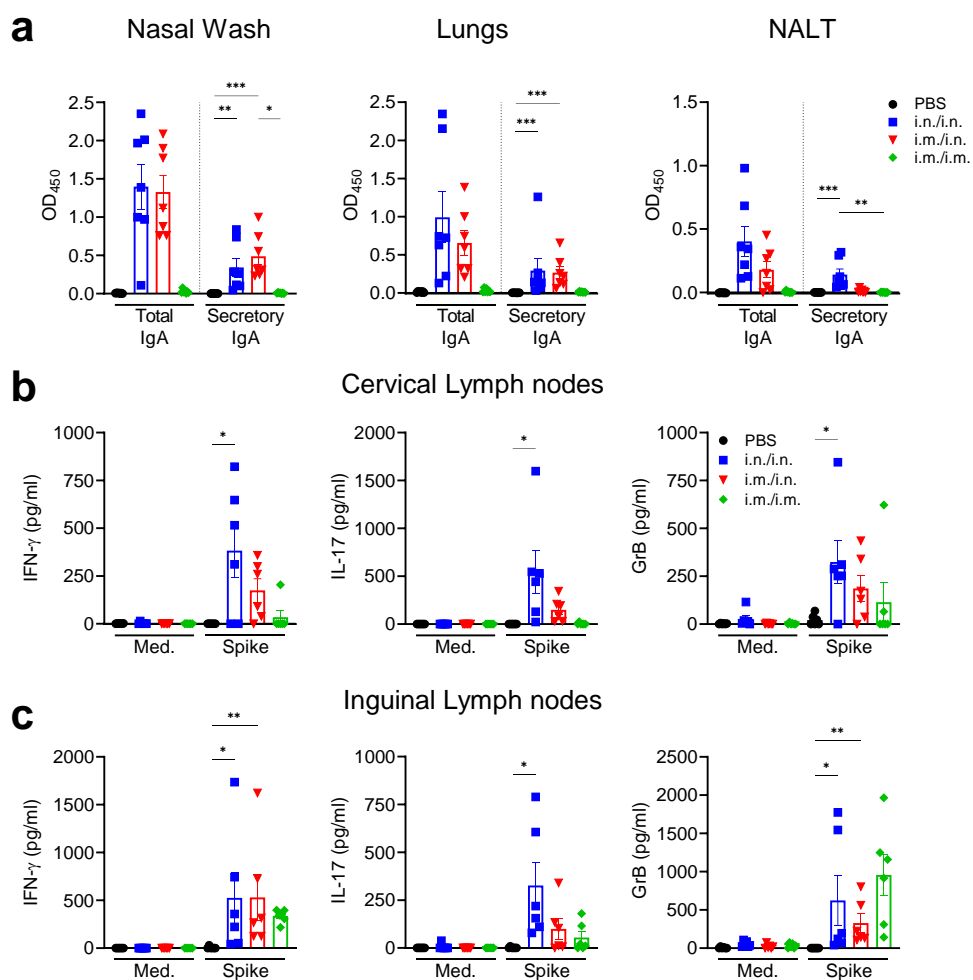

### Supplementary Figure 2. Immunogenicity of intranasal administration of Spike-LP-GMP vaccine.

C57BL/6 mice (n=7/group) were immunized twice (0 and 21 days) i.n./i.n., i.m./i.n. or i.m./i.m. with the Spike-LP-GMP vaccine or PBS and euthanized on day 35 for samples collection. Lung, Nasal wash, NALT (nasal associated lymphoid tissue), cervical and inguinal lymph nodes were collected at day 35. **(a)** Spike-specific total IgA and Spike-specific secretory IgA were analyzed in the Nasal wash (1/4 dilution), **(b)** lung (1/20 dilution), and **(c)** NALT (1/2 dilution) by ELISA. Spike-specific IFN- $\gamma$ , IL-17 and GrB production by cervical LN cells **(b)** and inguinal LN cells **(c)** stimulated for 72h with medium alone or Spike trimer (2.5  $\mu$ g/ml), were quantified by ELISA. Data were analyzed by one-way ANOVAs followed by post hoc Tukey's test for multiple comparisons (\*P < 0.05, \*\*P < 0.01, \*\*\*P < 0.001, and \*\*\*\*P < 0.0001), error bars, SEM. Results are representative of two independent experiments.

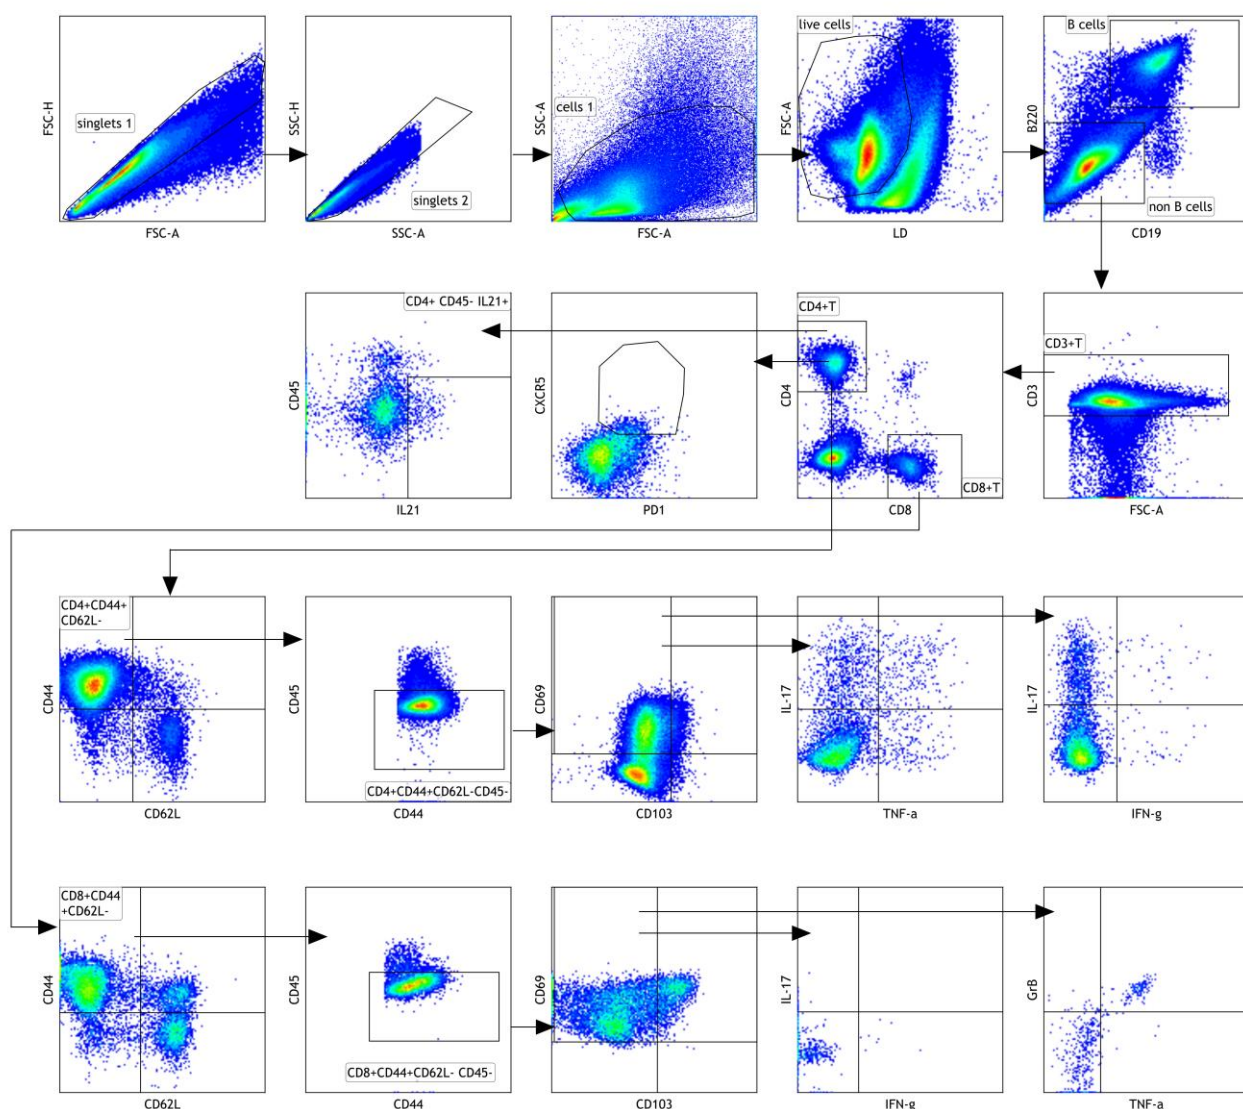

### Supplementary Figure 3. Flow cytometry gating strategy used for lung and nasal tissue cells analyses.

Singlets were gated on FSC-H/FSC-A and then SSC-H/SSC-A. Cells were gated on SSC-A/FSC-A. Live cells were gated on FSC-A/Live Dead<sup>+</sup>. Non-B cells were gated on B220<sup>-</sup>/CD19<sup>-</sup>. CD3<sup>+</sup> T cells were gated on CD3<sup>+</sup>/FSC-A. CD4<sup>+</sup> and CD8<sup>+</sup> T cells were gated on CD4<sup>+</sup>/CD8<sup>+</sup>, then out of the CD4<sup>+</sup> T cells, CD4<sup>+</sup>T<sub>FH</sub> were gated on PD-1<sup>+</sup>/CXCR-5<sup>+</sup>. Out of CD4<sup>+</sup> T cells, resident CD4<sup>+</sup> T cells secreting IL-21 were gated on CD45<sup>-</sup>/IL-21<sup>+</sup>. Out of CD4<sup>+</sup> T cells, effector memory CD4<sup>+</sup> T cells were gated on CD44<sup>+</sup>/CD62L<sup>-</sup>.

Out of CD4<sup>+</sup> CD44<sup>+</sup> CD62L<sup>-</sup> T cells, resident CD4<sup>+</sup> CD44<sup>+</sup> CD62L<sup>-</sup> were gated on CD45<sup>-</sup>/CD44<sup>+</sup>. Out of CD4<sup>+</sup> CD44<sup>+</sup> CD62L<sup>-</sup> CD45<sup>-</sup> T cells, resident memory CD4<sup>+</sup> T cells were gated on CD69<sup>+</sup>/CD103<sup>+</sup>. Out of CD4<sup>+</sup> CD44<sup>+</sup> CD62L<sup>-</sup> CD45<sup>-</sup> CD69<sup>+</sup> T cells, resident memory CD4<sup>+</sup> T cells secreting cytokines were gated on IL-17<sup>+</sup>/TNF<sup>+</sup> and IL-17<sup>+</sup>/IFN-γ<sup>+</sup>.

Out of CD8<sup>+</sup> T cells, effector memory CD8<sup>+</sup> T cells were gated on CD44<sup>+</sup>/CD62L<sup>-</sup>. Out of CD8<sup>+</sup> CD44<sup>+</sup> CD62L<sup>-</sup> T cells, resident CD8<sup>+</sup> CD44<sup>+</sup> CD62L<sup>-</sup> were gated on CD45<sup>-</sup>/CD44<sup>+</sup>. Out of CD8<sup>+</sup> CD44<sup>+</sup> CD62L<sup>-</sup> CD45<sup>-</sup> T cells, resident memory CD8<sup>+</sup> T cells were gated on CD69<sup>+</sup>/CD103<sup>+</sup>. Out of CD8<sup>+</sup> CD44<sup>+</sup> CD62L<sup>-</sup> CD45<sup>-</sup> CD69<sup>+</sup> T cells, resident memory CD8<sup>+</sup> T cells secreting cytokines were gated on GrB<sup>+</sup>/TNF<sup>+</sup> and IL-17<sup>+</sup>/IFN-γ<sup>+</sup>. Flow cytometry Data were analyzed using Kaluza Analysis Software (Beckman Coulter).

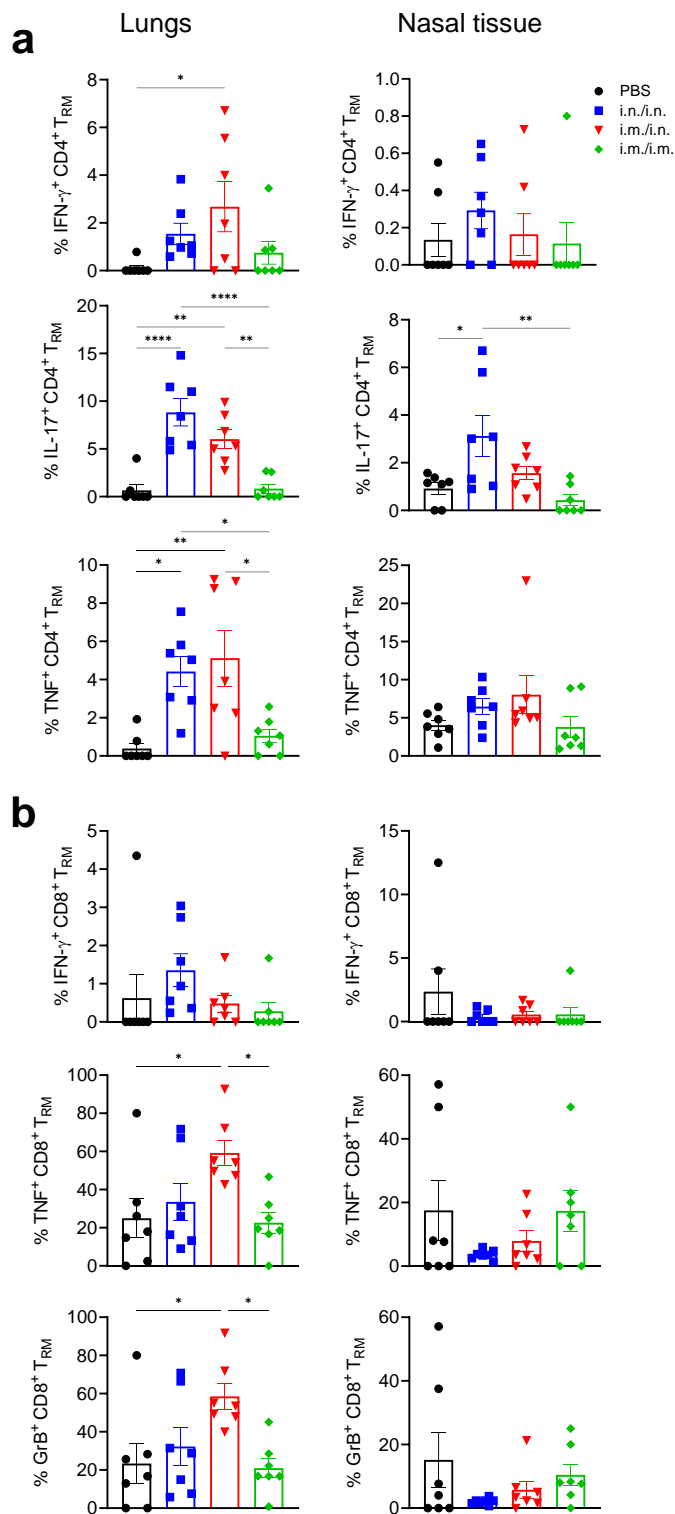

**Supplementary Figure 4. Frequency of Spike-specific cytokine-secreting CD4<sup>+</sup> T<sub>RM</sub> and CD8<sup>+</sup> T<sub>RM</sub> cells.**

C57BL/6 mice (n=7/group) were immunized twice (0 and 21 days) i.n./i.n., i.m./i.n. or i.m./i.m. with the Spike-LP-GMP vaccine or PBS and euthanized on day 35 for samples collection. Lung and Nasal tissue were collected at day 35 and stimulated for 18 h with Spike trimer (2.5 µg/ml). Cells were analyzed using flow cytometry. **(a)** Percentage of resident CD4<sup>+</sup> T<sub>RM</sub> cells (CD4<sup>+</sup> CD44<sup>+</sup> CD62L<sup>-</sup> CD45<sup>-</sup> CD69<sup>+</sup>) secreting IFN-γ, IL-17 and TNF in the lung and nasal tissue. **(b)** Percentage of resident CD8<sup>+</sup> T<sub>RM</sub> cells (CD8<sup>+</sup> CD44<sup>+</sup> CD62L<sup>-</sup> CD45<sup>-</sup> CD69<sup>+</sup>) secreting IFN-γ, TNF and GrB in the lung and nasal tissue. Data were analyzed by one-way ANOVAs followed by post hoc Tukey's test for multiple comparisons (\*P < 0.05, \*\*P < 0.01, \*\*\*P < 0.001, and \*\*\*\*P < 0.0001), error bars, SEM. Results are representative of three independent experiments.

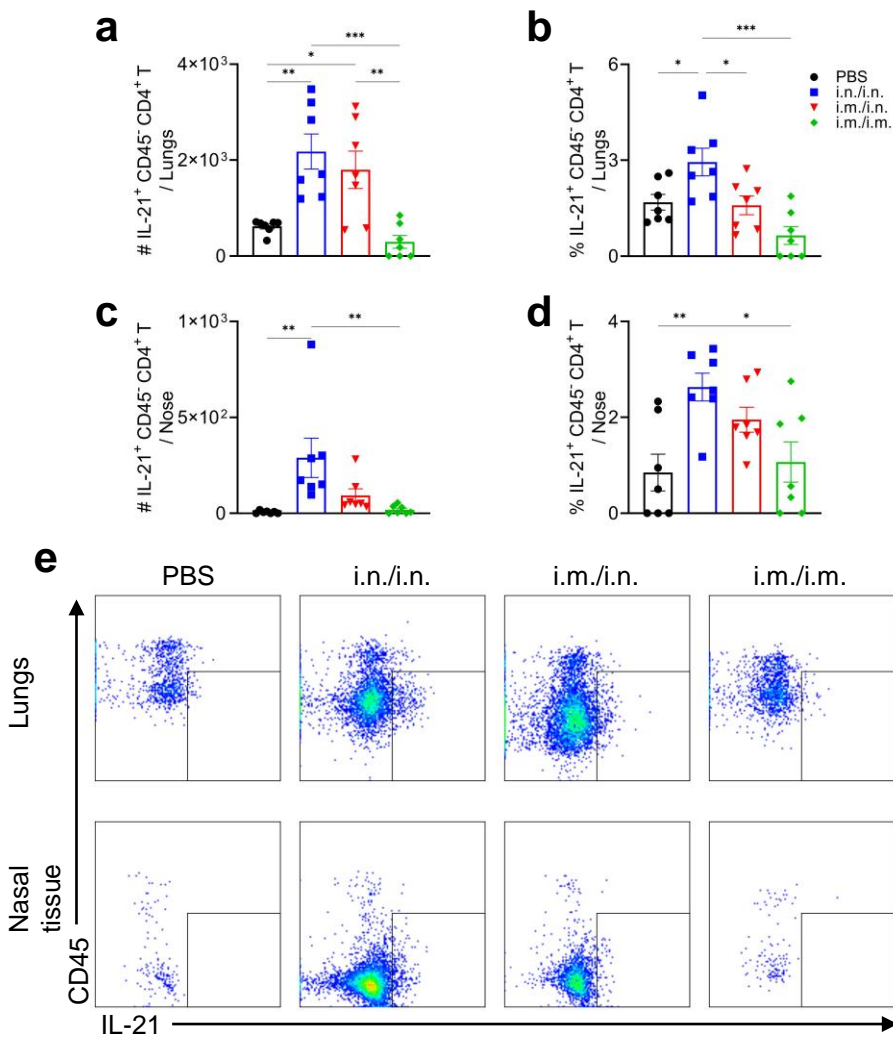

### Supplementary Figure 5. IL-21 secreting Spike-specific resident CD4<sup>+</sup> T cells in the lung and nasal tissue of immunized mice.

C57BL/6 mice (n=7/group) were immunized twice (0 and 21 days) i.n./i.n., i.m./i.n. or i.m./i.m. with the Spike-LP-GMP vaccine or PBS and euthanized on day 35 for samples collection. Lung and Nasal tissue were collected at day 35 and stimulated for 18 h with Spike trimer (2.5 µg/ml). Cells were analyzed using flow cytometry. **(a)** Number of resident CD4<sup>+</sup> T cells secreting IL-21 in the lung. **(b)** Percentage of resident CD4<sup>+</sup> T cells secreting IL-21 in the lung. **(c)** Number of resident CD4<sup>+</sup> T cells secreting IL-21 in the nasal tissue, **(d)** Percentage of resident CD4<sup>+</sup> T cells secreting IL-21 in the nasal tissue. **(e)** Representative flow cytometry plot of resident CD4<sup>+</sup> T cells secreting IL-21 in the lung and nasal tissue. Data were analyzed by one-way ANOVAs followed by post hoc Tukey's test for multiple comparisons (\*P < 0.05, \*\*P < 0.01, \*\*\*P < 0.001, and \*\*\*\*P < 0.0001), error bars, SEM.

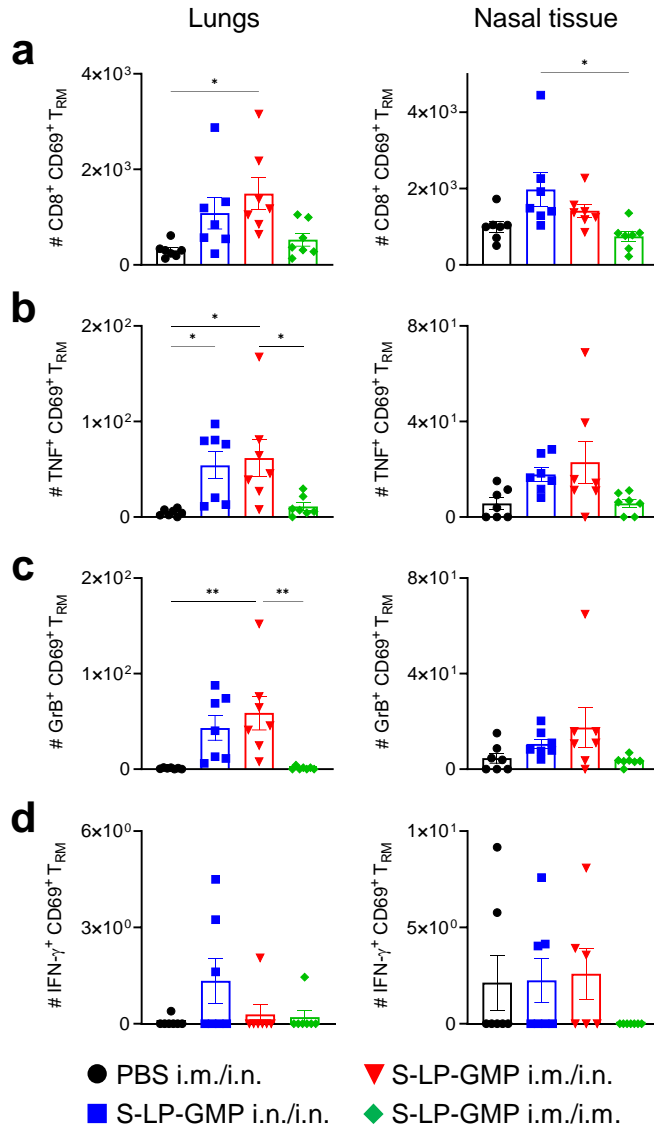

**Supplementary Figure 6. Spike-specific  $\text{CD8}^+ \text{T}_{\text{RM}}$  cells persist in the lungs and nasal tissue for at least 3 months post immunization.** Mice were immunized as described in Fig. 3, lung and nasal tissue samples were collected on day 111. **a** Number of  $\text{CD8}^+ \text{T}_{\text{RM}}$  cells ( $\text{CD44}^+ \text{CD62L}^- \text{CD45}^- \text{CD69}^+$ ) in the lung and nasal tissue. **b-c** Number of Spike-specific  $\text{CD8}^+ \text{T}_{\text{RM}}$  cells secreting TNF (**b**), GrB (**c**) or IFN- $\gamma$  (**d**) in the lung and nasal tissue following 18 h stimulation with Spike trimer ( $2.5 \mu\text{g/ml}$ ). Data were analyzed by one-way ANOVAs followed by post hoc Tukey's test for multiple comparisons (\* $P < 0.05$ , \*\* $P < 0.01$ , \*\*\* $P < 0.001$ , and \*\*\*\* $P < 0.0001$ ), error bars, SEM.

Supplementary Table 1. List of antibodies

Unstimulated cells

|                        | marker    | flurochrome | dilution | clone    | reference  | supplier               |
|------------------------|-----------|-------------|----------|----------|------------|------------------------|
| Extracellular staining | Live dead | AQUA        | 1/600    | L34957   | L34957     | BD Bioscience          |
|                        | CXCR-5    | Biotin/APC  | 1/200    | L138D7   | 13-7185-82 | Biolegend              |
|                        | CD69      | AF647       | 1/200    | H1.2F3   | 104518     | Biolegend              |
|                        | CD8       | AF700       | 1/200    | 53-6.7   | 56-0081-82 | invitrogen/ebioscience |
|                        | CD3       | EF450       | 1/200    | 145-2C11 | 48-0031-82 | ebioscience            |
|                        | PD-1      | BV711       | 1/200    | 29F.1A12 | 135231     | Biolegend              |
|                        | CD4       | BV785       | 1/200    | RM4-5    | 100552     | Biolegend              |
|                        | CD103     | PE-CF594    | 1/200    | M290     | 565849     | BD Bioscience          |
|                        | B220      | PECY5       | 1/200    | RA3-6B2  | 565849     | Biolegend              |
|                        | CD62L     | PECY7       | 1/200    | MEL-14   | 565849     | Biolegend              |
|                        | CD19      | BB700       | 1/200    | 1D3      | 566412     | BD Biosciences         |
|                        | CD44      | AF594       | 1/200    | IM7      | 103054     | Biolegend              |
|                        | Fc Block  |             | 1/200    | 2.4G2    | 553142     | BD Biosciences         |

|                       |      |    |                 |        |  |                        |
|-----------------------|------|----|-----------------|--------|--|------------------------|
| intravenous injection | CD45 | PE | 3.75µg in 200µL | 30-F11 |  | invitrogen/ebioscience |
|-----------------------|------|----|-----------------|--------|--|------------------------|

Antigen-stimulated cells

|                        | marker         | flurochrome | dilution | clone    | reference  | supplier               |
|------------------------|----------------|-------------|----------|----------|------------|------------------------|
| Extracellular staining | Life dead      | AQUA        | 1/600    | L34957   | L34957     | BD Bioscience          |
|                        | CD69           | AF647       | 1/200    | H1.2F3   | 104518     | Biolegend              |
|                        | CD8            | AF700       | 1/200    | 53-6.7   | 56-0081-82 | invitrogen/ebioscience |
|                        | CD4            | BV785       | 1/200    | RM4-5    | 100552     | Biolegend              |
|                        | CD3            | APC-EF780   | 1/200    | 145-2C11 | 47003182   | invitrogen/ebioscience |
|                        | CD103          | PE-CF594    | 1/200    | M290     | 565849     | BD Bioscience          |
|                        | CD62L          | PE-Cy5      | 1/100    | MEL-14   | 565849     | Biolegend              |
|                        | CD44           | AF594       | 1/200    | IM7      | 103054     | Biolegend              |
|                        | CD19           | PE-Cy7      | 1/200    | 1D3      | 115520     | ebioscience            |
|                        | Fc Block 2.4G2 |             | 1/200    | 2.4G2    | 553142     | BD Biosciences         |

|                        |            |       |       |            |            |                        |
|------------------------|------------|-------|-------|------------|------------|------------------------|
| Intracellular staining | IL-17      | V450  | 1/200 | TC11-18H10 | 560522     | BD Bioscience          |
|                        | IFN-g      | APC   | 1/200 | XMG1.2     | MABF1516   | invitrogen/ebioscience |
|                        | TNF        | BV650 | 1/200 | MP6-XT22   | 563943     | BD Bioscience          |
|                        | granzyme B | FITC  | 1/200 | NGZB       | 563943     | invitrogen/ebioscience |
|                        | IL-21      | PE    | 1/200 | mhalx21    | 12-7213-82 | BD Bioscience          |

Supplementary Table 2. List of reagents

|                  | Name                                                       | Reference          | supplier               |         |
|------------------|------------------------------------------------------------|--------------------|------------------------|---------|
| ELISA Kits       | IL-17                                                      | DY421              | Bio-techne             |         |
|                  | Granzyme B                                                 | DY1865-05          | Bio-techne             |         |
|                  | TNF                                                        | DY410              | Bio-techne             |         |
|                  | IL-1β                                                      | DY401              | Bio-techne             |         |
|                  | IFN-γ                                                      | 551216/554410      | BD                     |         |
|                  | IL-6                                                       | 554400/554402      | BD                     |         |
| ELISA antibodies | Goat anti-mouse IgG                                        | G-21234            | Biosciences            |         |
|                  | Goat anti-mouse IgG2c                                      | STAR135P           | Accuscience            |         |
|                  | Goat anti-mouse IgA                                        | 1040-05            | Southernbiotech        |         |
|                  | Anti-mouse secretory IgA component                         | RE03MOES01461      | AssayGenie - MSC       |         |
| MSD kit          | Meso-scale discovery SARS-CoV-2/ACE-2 neutralization assay | K15386U-2          | Meso Scale Diagnostics |         |
| Molecules        | Spike trimer wuhan-1                                       | Custom made        | Peak protein           | UK      |
|                  | Spike trimer β strain                                      | Custom made        | Peak protein           | UK      |
|                  | LP1569                                                     | Custom made        | EMC microcollections   | Germany |
|                  | C-di-GMP                                                   | tlrl-nacd-g-5      | Invivogen              | France  |
|                  | Human ACE-2                                                | 10108-H08H-B       | Sino Biological        | China   |
| Softwares        | Prism 9                                                    | Graph-Pad          |                        |         |
|                  | Kaluzza                                                    | Beckman Coulter    |                        |         |
|                  | Softmax Pro 7.0.3                                          | Molecular Devices  |                        |         |
|                  | SpectroFlo                                                 | Cytect Biosciences |                        |         |
